# Supplementary material for: Inverse CO2/C2H2 separation assisted by coordinated water in a dysprosium(iii) metal–organic framework
Source: Royal Society of Chemistry journal article supplement (doi:10.1039/d3cc03519k), 2023-01-01
Supplement: d3cc03519k1.pdf [file d3cc03519k1.pdf]

## Supplementary Information

### Inverse CO<sub>2</sub>/C<sub>2</sub>H<sub>2</sub> Separation Assisted by Coordinated Water in a Dysprosium (III) Metal–Organic Frameworks

**Bo-Kai Ling,<sup>a,b</sup> Min Zeng,<sup>a,b</sup> Tao Zhang,<sup>a</sup> Jian-Wei Cao,<sup>a</sup> Rong Yang,<sup>a</sup> Lu Cheng,<sup>a</sup> Chi-Yu Zhang,<sup>a</sup> Yu Wang<sup>\*a</sup> and Kai-Jie Chen<sup>\*a</sup>**

<sup>a</sup>Key Laboratory of Special Functional and Smart Polymer Materials of Ministry of Industry and Information Technology, Xi'an Key Laboratory of Functional Organic Porous Materials, School of Chemistry and Chemical Engineering, Northwestern Polytechnical University, Xi'an, Shaanxi 710072, P.R. China.

<sup>b</sup>These authors contributed equally.

## Materials and Methods

### 1.1 Generals

All chemicals and solvents used were commercially available and used without further purifications. Powder X-ray diffraction (PXRD) data were collected with a Rigaku-Miniflex-600 X-ray powder diffractometer or a Rigaku SmartLab using Cu K $\alpha$  radiation ( $\lambda = 1.5406 \text{ \AA}$  nm). Field emission scanning electron microscope (FE-SEM) experiments were characterized by FEI Verios G4 SEM. Thermogravimetric analysis (TGA) was carried out in a flow of nitrogen using a TGA-2 (METTLER TOLEDO) with a heating rate of 10 °C/min.

### 1.2 Preparation of Dy-F-oxa

The powder sample of **Dy-F-oxa** were prepared according to the literature report with some modifications<sup>1,2</sup>. To a 100 mL Teflon vial, 20 mL Dy(NO<sub>3</sub>)<sub>3</sub>·6H<sub>2</sub>O (0.02 M), 20 mL NaF (0.02 M) and 20 mL Na<sub>2</sub>C<sub>2</sub>O<sub>4</sub> (0.02 M) aqueous solutions were added and heated to *ca.* 60 °C under stirring. The precipitate was collected by filtration and washed with distilled water. Yield (based on Dy): 90.5%.

### 1.3 Gas adsorption

A Micromeritics 3Flex instrument was used for recording all gas sorption isotherms, CO<sub>2</sub> (195, 273 and 298 K) and C<sub>2</sub>H<sub>2</sub> (273 and 298 K). For N<sub>2</sub> adsorption isotherms, the temperature was controlled at 77 K using a Dewar containing 4 L liquid N<sub>2</sub>. Precise control of 273 K and 298 K temperatures was implemented by a dc-2006 from Ningbo Scientz Biotechnology, which contained a cyclic control system of ethylene glycol and water mixture (*v/v* = 1:1). Helium was used for the estimation of dead space for gas and water adsorption measurements. The activation of the **Dy-F-oxa** sample was achieved by degassing for 4 h at 80 °C under a dynamical vacuum using a degassing station.

### 1.4 Isotheric heat of adsorption

A virial-type expression of the below form was used to fit the combined isotherm data of CO<sub>2</sub> and C<sub>2</sub>H<sub>2</sub> at 273 and 298 K, where  $P$  is the pressure described in Pa,  $N$  is the adsorbed amount in mmol/g,  $T$  is the temperature in K,  $a_i$  and  $b_i$  are virial coefficients, and  $m$  and  $n$  are the number of coefficients used to describe the isotherms.  $Q_{st}$  is the coverage-dependent enthalpy of adsorption and  $R$  is the universal gas constant

$$\ln P = \ln N + \frac{1}{T} \sum_{i=0}^m a_i N^i + \sum_{j=0}^n b_j N^j$$

$$Q_{st} = -R \sum_{i=0}^5 a_i N^i$$

### 1.5 Langmuir-Freundlich fitting

The isothermal for different gases at 298 K were fitted using the Langmuir-Freundlich model as following:

$$q = q_{sat} \frac{b_A p^n}{1 + b_A p^n}$$

where  $q$  and  $q_{sat}$  are gas loading at a specific pressure and saturation respectively,  $b_A$  is Langmuir-Freundlich constant at A site,  $n$  is Freundlich exponent and  $p$  is pressure.

### 1.6 IAST calculations of adsorption selectivity

The selectivity of equimolar CO<sub>2</sub>/C<sub>2</sub>H<sub>2</sub> binary mixtures at 298 K was calculated using ideal adsorption solution theory (IAST) method<sup>3</sup>, and the selectivity is defined as following:

$$S = \frac{x_A/x_B}{y_A/y_B}$$

where  $S$  is the selectivity of A towards B,  $x_A$  and  $x_B$  are the molar fractions of A and B in the adsorbent respectively,  $y_A$  and  $y_B$  are the molar fractions of A and B in the gas mixture respectively.

### 1.7 Computational details

To understand the host-guest interactions between the framework and CO<sub>2</sub> and C<sub>2</sub>H<sub>2</sub> molecules, the Grand Canonical Monte Carlo (GCMC) simulations were performed using the Sorption module in Material Studio software package. The simulation box for **Dy-F-oxa** was built from the single-crystal

structure with  $1 \times 1 \times 1$  supercell after making *P1* and the CIF files were adapted from Cambridge Crystallographic Data Centre (CCDC) for free. All the frameworks and gas molecules were both treated as rigid bodies and the  $Q_{\text{eq}}$  fitted charge and the ESP charge were assigned to the hosts and guests respectively. The loading steps, equilibration steps, and production steps were all set to  $2.0 \times 10^7$ . The Metropolis method was applied during the simulation<sup>4</sup>. All the host-guest interaction behavior was described using Universal force field (UFF<sup>5</sup>). The cut-off radius used for the Lennard–Jones interactions is 18.5 Å.

## 1.8 Breakthrough experiments

The breakthrough curves were recorded on a homemade apparatus. Activated **Dy-F-oxa** 3.2g particles were prepared and packed into a stainless-steel column. An equimolar gas mixture of CO<sub>2</sub> and C<sub>2</sub>H<sub>2</sub> (total gas pressure and flow: 100 kPa and 1 cm<sup>3</sup>/min) passes through the packing column at 298 K, and the outlet gas concentration was monitored by a gas chromatography analyzer (TCD-Thermal Conductivity Detector, detection limit 0.1 ppm). During gas breakthrough cycling tests, the sample in the column was regenerated under He flow of 20 cm<sup>3</sup>/min at 80 °C for 8 hours, after each breakthrough experiment.

Productivity of C<sub>2</sub>H<sub>2</sub> is derived from breakthrough experiments following this definition:

$$p = \frac{F \times y_{\text{C}_2\text{H}_2} \times \int_{t_1}^{t_2} \frac{C(t)}{C_0} dt}{V_m}$$

where  $P$  is the C<sub>2</sub>H<sub>2</sub> productivity in mmol/g,  $t_1$  is the C<sub>2</sub>H<sub>2</sub> breakthrough time in min/g,  $t_2$  is the breakthrough time of other gas,  $F$  is the inlet gas volume flow rate,  $y_{\text{C}_2\text{H}_2}$  is the volume fraction of C<sub>2</sub>H<sub>2</sub> in mixed gas,  $C(t)$  is the C<sub>2</sub>H<sub>2</sub> concentration in the outlet gas,  $C_0$  is the C<sub>2</sub>H<sub>2</sub> concentration in the inlet gas,  $V_m$  is molar volume of gas.

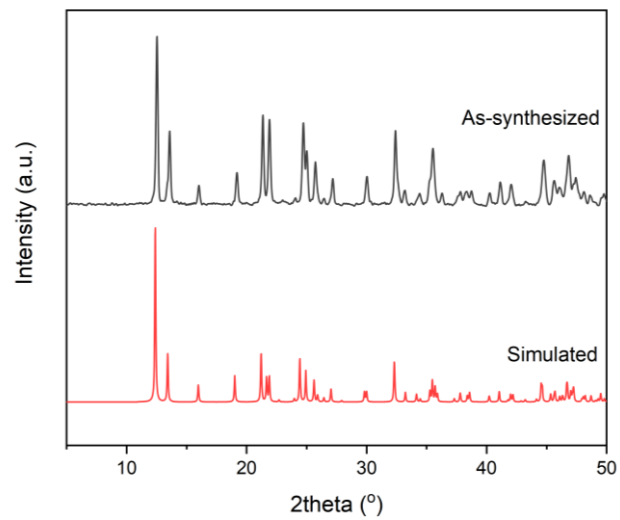

**Fig. S1** As-synthesized (black) and simulated (red) PXRD patterns of **Dy-F-oxa**.

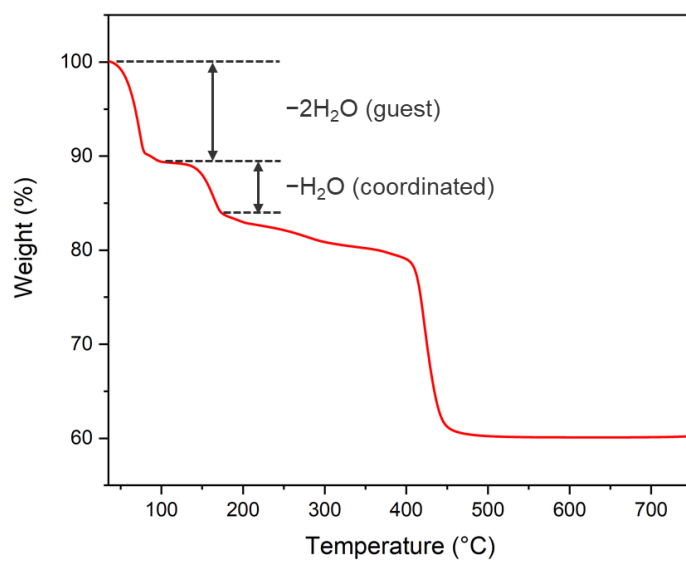

**Fig. S2** TGA curve of **Dy-F-oxa**.

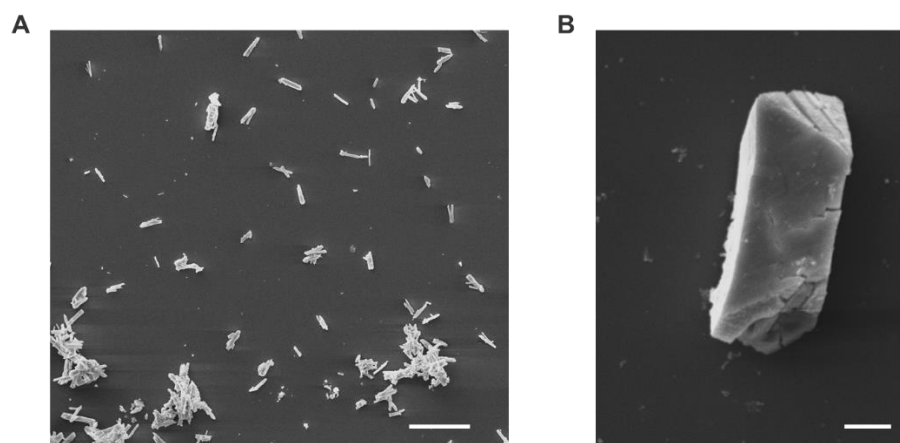

**Fig. S3.** The FESEM images of **Dy-F-oxa** samples. Scale bars on the image (A) and (B) are 10 and 2  $\mu\text{m}$ , respectively.

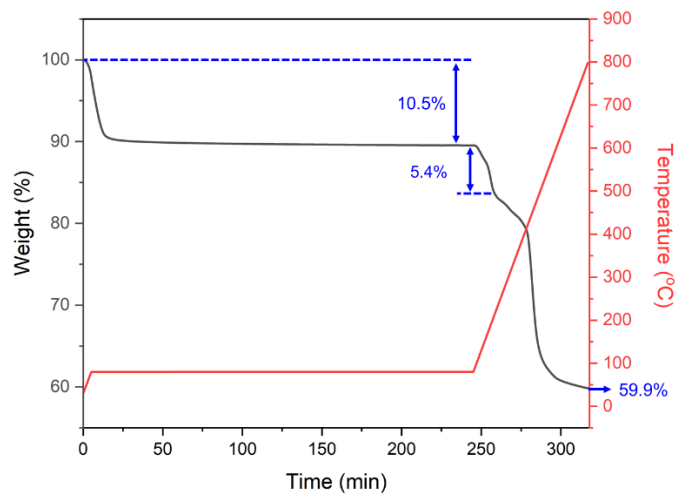

**Fig. S4** TGA curve of activated **Dy-F-oxa**. With the heating rate of 10 °C/min, the sample was heated to 80 °C and keep this temperature for 4 hours. Then the activated sample was heated to 800 °C.



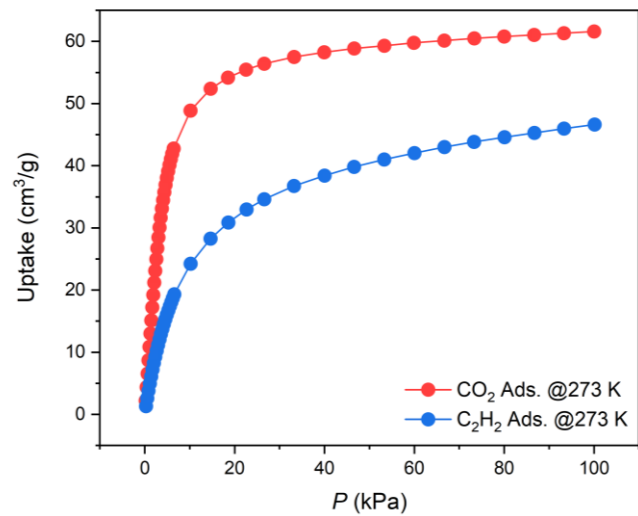

**Fig. S5** CO<sub>2</sub> and C<sub>2</sub>H<sub>2</sub> adsorption isotherms at 273 K of **Dy-F-oxa**.

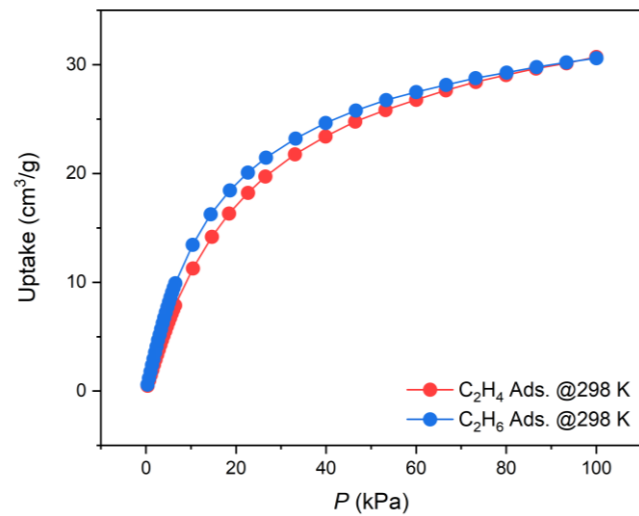

**Fig. S6** C<sub>2</sub>H<sub>4</sub> and C<sub>2</sub>H<sub>6</sub> adsorption isotherms at 298 K of **Dy-F-oxa**.

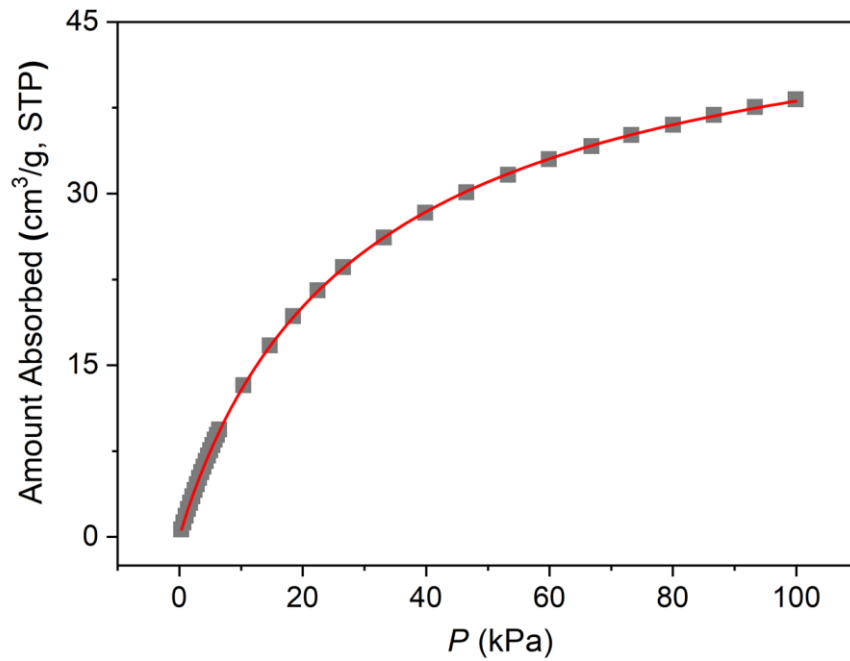

|                  |                                                    |                |
|------------------|----------------------------------------------------|----------------|
| Equation         | $A1 \cdot B1 \cdot x^{C1} / (1 + B1 \cdot x^{C1})$ |                |
| Reduced Chi-Sqr  | 0.00395                                            |                |
| Adj. R-Square    | 0.99998                                            |                |
|                  | Value                                              | Standard Error |
| A1 ( $q_{sat}$ ) | 50.07238                                           | 0.16576        |
| B1 ( $b_A$ )     | 0.03721                                            | 1.64328E-4     |
| C1 (n)           | 0.96589                                            | 0.00297        |

**Fig. S7** The Langmuir-Freundlich fitting details of  $C_2H_2$  adsorption isotherm at 298 K for **Dy-F-oxa** and the solid lines are the best fit for the data.

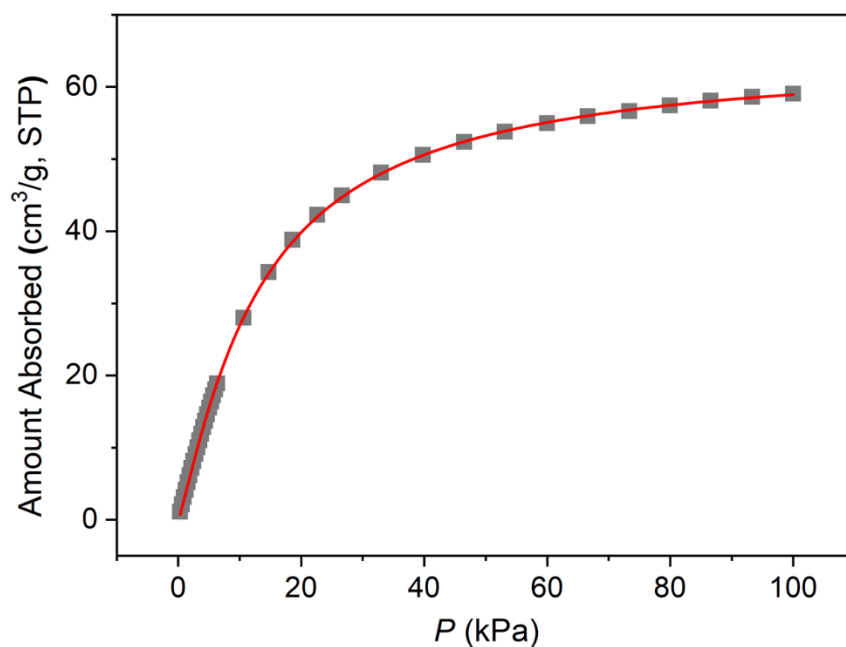

|                  |                                                    |                |
|------------------|----------------------------------------------------|----------------|
| Equation         | $A1 \cdot B1 \cdot x^{C1} / (1 + B1 \cdot x^{C1})$ |                |
| Reduced Chi-Sqr  | 0.03952                                            |                |
| Adj. R-Square    | 0.99991                                            |                |
|                  | Value                                              | Standard Error |
| A1 ( $q_{sat}$ ) | 64.42253                                           | 0.18893        |
| B1 ( $b_A$ )     | 0.04785                                            | 4.83903E-4     |
| C1 (n)           | 1.17589                                            | 0.00635        |

**Fig. S8** The Langmuir-Freundlich fitting details of CO<sub>2</sub> adsorption isotherm at 298 K for **Dy-F-oxa** and the solid lines are the best fit for the data.

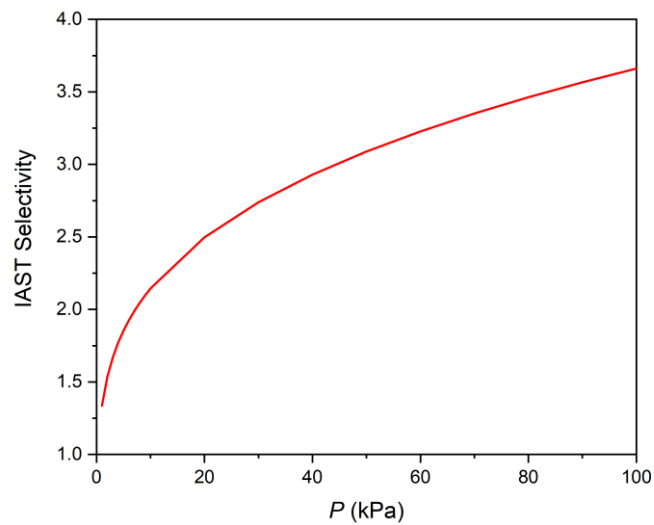

**Fig. S9** Calculated IAST selectivity of **Dy-F-oxa** for CO<sub>2</sub>/C<sub>2</sub>H<sub>2</sub> with 1:1 ratio at 298 K.

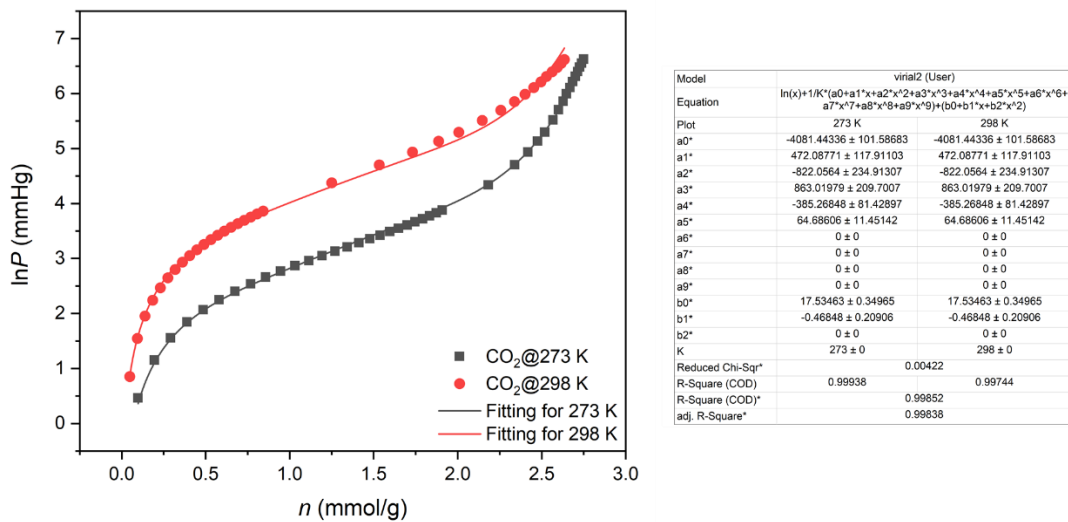

**Fig. S10** Virial equation (lines) fitting of the experimental CO<sub>2</sub> adsorption data (symbols) for **Dy-F-oxa**.

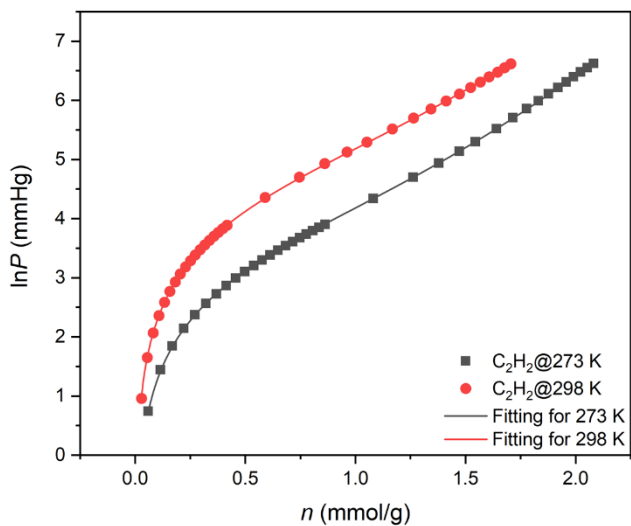

| Model            | virial2 (User)                                                                                   |                        |
|------------------|--------------------------------------------------------------------------------------------------|------------------------|
| Equation         | $\ln(x)+1/K(a_0+a_1x+a_2x^2+a_3x^3+a_4x^4+a_5x^5+a_6x^6+a_7x^7+a_8x^8+a_9x^9)+(b_0+b_1x+b_2x^2)$ |                        |
| Plot             | 273 K                                                                                            | 298 K                  |
| a0*              | -3290.05916 ± 15.56158                                                                           | -3290.05916 ± 15.56158 |
| a1*              | 24.51663 ± 26.68188                                                                              | 24.51663 ± 26.68188    |
| a2*              | -60.66684 ± 59.67348                                                                             | -60.66684 ± 59.67348   |
| a3*              | 66.74638 ± 74.01187                                                                              | 66.74638 ± 74.01187    |
| a4*              | 7.04742 ± 39.68621                                                                               | 7.04742 ± 39.68621     |
| a5*              | -4.67162 ± 7.62763                                                                               | -4.67162 ± 7.62763     |
| a6*              | 0 ± 0                                                                                            | 0 ± 0                  |
| a7*              | 0 ± 0                                                                                            | 0 ± 0                  |
| a8*              | 0 ± 0                                                                                            | 0 ± 0                  |
| a9*              | 0 ± 0                                                                                            | 0 ± 0                  |
| b0*              | 15.5606 ± 0.05296                                                                                | 15.5606 ± 0.05296      |
| b1*              | 0.55093 ± 0.05493                                                                                | 0.55093 ± 0.05493      |
| b2*              | 0 ± 0                                                                                            | 0 ± 0                  |
| K                | 273 ± 0                                                                                          | 298 ± 0                |
| Reduced Chi-Sqr* |                                                                                                  | 1.04496E-4             |
| R-Square (COD)*  | 0.99997                                                                                          | 0.99995                |
| R-Square (COD)*  |                                                                                                  | 0.99996                |
| adj. R-Square*   |                                                                                                  | 0.99996                |

**Fig. S11** Virial equation (lines) fitting of the experimental  $C_2H_2$  adsorption data (symbols) for **Dy-F-oxa**.

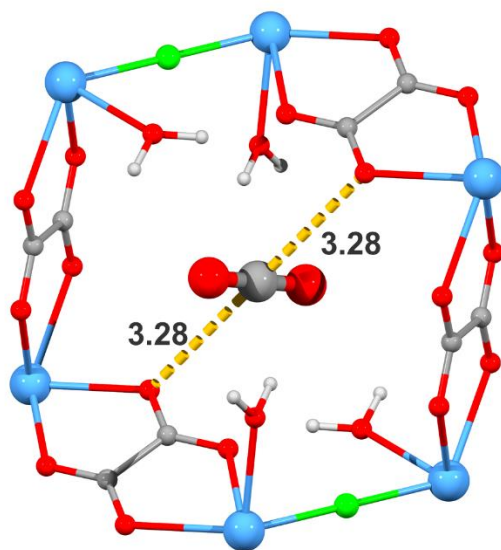

**Fig. S12** Interactions between electropositive  $C^{\delta+}$  atom of  $CO_2$  and nearby O atoms of two carboxyl groups in **Dy-F-oxa**. Distances are given in Å.



## References.

1. L.-L. Li, Y.-F. Fang, S. Liu, S.-S. Chen and W.-Z. Wang, *Inorg. Chim. Acta*, 2022, **538**, 120979.
2. L. Li, Y. Fang, S. Liu, M. Hu and W. Wang, *J. Rare Earths*, 2023, **41**, 100–107.
3. A. L. Myers, J. M. Prausnitz, *AIChE J.* 1965, **11**, 121–127.
4. N. Metropolis, A. W. Rosenbluth, M. N. Rosenbluth, A. H. Teller and E. Teller, *J. Chem. Phys.*, 1953, **21**, 1087–1092.
5. A. K. Rappe, K. S. Colwell and C. J. Casewit, *Inorg. Chem.*, 1993, **32**, 3438–3450.
